# Supplementary material for: Global soil organic carbon removal by water erosion underclimate change and land use change during 1850–2005 AD
Source: Copernicus journal article supplement (doi:10.5194/bg-2017-527), 2018-01-23
Supplement: Supplementary file [file bg-2017-527-AC2-supplement.pdf]

Table 5

| Soil depth (m) | GSDE SOC total (Pg) | S1 SOC total (Pg) | S3 SOC total (Pg) | RMSE S1 | RMSE S3 | r –value S1 | r – value S3 |
|----------------|---------------------|-------------------|-------------------|---------|---------|-------------|--------------|
| 0.3            | 670                 | 428               | 556               | 5218    | 5861    | 0.43        | 0.44         |
| 1              | 1356                | 672               | 846               | 14077   | 10213   | 0.52        | 0.51         |
| 2              | 1748                | 1001              | 1284              | 12968   | 13195   | 0.56        | 0.55         |

*The tables of the original manuscript are changed as following:*

Table2

| PFT    | Mean soil erosion (t ha <sup>-1</sup> y <sup>-1</sup> ) | Standard deviation soil erosion (t ha <sup>-1</sup> y <sup>-1</sup> ) | Mean SOC erosion (kg C ha <sup>-1</sup> y <sup>-1</sup> ) | Standard deviation SOC erosion (kg C ha <sup>-1</sup> y <sup>-1</sup> ) |
|--------|---------------------------------------------------------|-----------------------------------------------------------------------|-----------------------------------------------------------|-------------------------------------------------------------------------|
| Crop   | 1.71±0.66                                               | 24.95±12.44                                                           | 288.17±64.86                                              | 43563±11512                                                             |
| Grass  | 1.88±0.46                                               | 32.67±8.58                                                            | 83.52±15.94                                               | 4613±1231                                                               |
| Forest | 0.26±0.13                                               | 2.31±1.68                                                             | 12.36±4.26                                                | 326±92                                                                  |

Table 3: only SOC erosion rates, their standard deviations and changes are corrected

| Region        | Mean soil erosion rate                     | Standard deviation soil erosion rate       | Change in mean soil erosion rate                 | Mean SOC erosion rate                         | Standard deviation SOC erosion rate           | Change in mean SOC erosion rate                    |
|---------------|--------------------------------------------|--------------------------------------------|--------------------------------------------------|-----------------------------------------------|-----------------------------------------------|----------------------------------------------------|
|               | 2005 (t ha <sup>-1</sup> y <sup>-1</sup> ) | 2005 (t ha <sup>-1</sup> y <sup>-1</sup> ) | 2005 -1851 (t ha <sup>-1</sup> y <sup>-1</sup> ) | 2005 (kg C ha <sup>-1</sup> y <sup>-1</sup> ) | 2005 (kg C ha <sup>-1</sup> y <sup>-1</sup> ) | 2005-1851 (kg C ha <sup>-1</sup> y <sup>-1</sup> ) |
| Africa        | 2.69±0.75                                  | 68.47±21.84                                | 0.69±0.12                                        | 13.17±5.01                                    | 100.56±69.56                                  | 4.31±3.92                                          |
| Asia          | 6.03±1.31                                  | 167.83±41.62                               | 0.23±0.12                                        | 57.85±14.79                                   | 831.7±354.05                                  | 3.22±8.21                                          |
| Europe        | 2.45±0.36                                  | 73.7±12.9                                  | 0.48±0.12                                        | 16.67±3.37                                    | 347.74±91.1                                   | 1.39±0.99                                          |
| Australia     | 1.46±0.42                                  | 16.98±5.66                                 | -0.5±0.11                                        | 5.14±1.27                                     | 23.14±7.45                                    | 1.81±0.68                                          |
| South-America | 4.69±1.19                                  | 117.58±33.24                               | 1.35±0.42                                        | 74.27±21.68                                   | 1552.04±537.61                                | 38.89±16.69                                        |
| North-America | 2.83±0.55                                  | 63.68±11.06                                | 0.15±0.06                                        | 32.85±6.24                                    | 571.24±91.69                                  | 3.14±2.66                                          |
| Global        | 3.92±0.89                                  | 104.48±26.99                               | 0.5±0.07                                         | 38.49±10.12                                   | 690.96±264.47                                 | 8.92±6.31                                          |

Table 4

| Region            | Change<br>SOC stocks<br>S1 | Change<br>SOC stocks<br>S2 | Change SOC<br>stocks<br>S1-S2 | Change<br>SOC<br>stocks<br>S3 | Change<br>SOC stocks<br>S4 | Change<br>SOC stocks<br>S3-S4 |
|-------------------|----------------------------|----------------------------|-------------------------------|-------------------------------|----------------------------|-------------------------------|
|                   | Pg C                       | Pg C                       | Pg C                          | Pg C                          | Pg C                       | Pg C                          |
| Africa            | -1.55±0.01                 | -0.24±0.03                 | -1.31±0.04                    | -1.54                         | -0.55                      | -0.98                         |
| Asia              | -0.36±0.77                 | 7.94±0.001                 | -8.31±0.77                    | 0.65                          | 7.11                       | -6.47                         |
| Europe            | -3.33±0.91                 | 1.78±0.11                  | -5.12±0.81                    | -4.35                         | 1.52                       | -5.87                         |
| Australia         | 0.21±0.01                  | 0.05±0.003                 | 0.16±0.01                     | 0.29                          | 0.01                       | 0.28                          |
| South-<br>America | 2.24±0.22                  | 2.82±0.07                  | -0.59±0.29                    | 3.75                          | 2.06                       | 1.69                          |
| North-<br>America | -2.62±0.10                 | 3.19±0.05                  | -5.81±0.95                    | -2.5                          | 3.03                       | -5.53                         |
| Global            | -5.35±0.27                 | 15.93±0.21                 | -21.29±2.48                   | -3.3                          | 13.86                      | -17.16                        |

Table 7: only SOC fluxes from our study are corrected

| Region            | <i>Our Study</i>                            |                                          | <i>Doetterl et al. (2012)</i>               |                                          |
|-------------------|---------------------------------------------|------------------------------------------|---------------------------------------------|------------------------------------------|
|                   | Sediment flux<br>2005<br>Pg y <sup>-1</sup> | SOC flux<br>2005<br>Tg C y <sup>-1</sup> | Sediment flux<br>2000<br>Pg y <sup>-1</sup> | SOC flux<br>2000<br>Tg C y <sup>-1</sup> |
| Africa            | 2.6                                         | 20.29±8.28                               | 2.4                                         | 39.5                                     |
| Asia              | 5.4                                         | 54.34±20.63                              | 4.9                                         | 90.0                                     |
| Europe            | 2.1                                         | 30.8±6.40                                | 1.9                                         | 39.5                                     |
| Australia         | 0.2                                         | 2.45±0.52                                | 0.3                                         | 4.3                                      |
| South-<br>America | 1.6                                         | 39.03±15.74                              | 1.4                                         | 26.7                                     |
| North-<br>America | 0.7                                         | 12.37±3.39                               | 1.6                                         | 31.5                                     |
| Total             | 12.6                                        | 161.53±55.74                             | 12.5                                        | 231.5                                    |
